# Supplementary material for: An effective amino acid-assisted growth of ultrafine palladium nanocatalysts toward superior synergistic catalysis for hydrogen generation from formic acid
Source: Royal Society of Chemistry journal article supplement (doi:10.1039/c9qi00037b), 2019-01-01
Supplement: c9qi00037b1.pdf [file c9qi00037b1.pdf]

*Electronic Supplementary Information*

**An effective amino acid-assisted growth of ultrafine palladium nanocatalysts  
toward superior synergistic catalysis for hydrogen generation from formic acid**

Cheng-Bin Hong,<sup>a,b</sup> De-Jie Zhu,<sup>a,b</sup> Dong-Dong Ma,<sup>a</sup> Xin-Tao Wu,<sup>a</sup> and Qi-Long

Zhu<sup>a,\*</sup>

<sup>a</sup> State Key Laboratory of Structure Chemistry, Fujian Institute of Research on the  
Structure of Matter, Chinese Academy of Science, Fuzhou 350002, China

<sup>b</sup> University of Chinese Academy of Sciences, Beijing 100049, China

\*Corresponding Author: [qlzhu@fjirsm.ac.cn](mailto:qlzhu@fjirsm.ac.cn)

**Table S1.** Catalytic activities for hydrogen generation from formic acid catalyzed by various heterogeneous catalysts

| Catalyst                                                      | Additive         | Temp. (°C) | CO evolution | TOF (h <sup>-1</sup> ) | Ref.             |
|---------------------------------------------------------------|------------------|------------|--------------|------------------------|------------------|
| <b>Arg-Pd/MS-30</b>                                           | HCOONa           | <b>60</b>  | <b>No</b>    | <b>5723</b>            | <b>This work</b> |
|                                                               | None             | <b>50</b>  | <b>No</b>    | <b>1365</b>            | <b>This work</b> |
| <b>Pd/MS-30</b>                                               | HCOONa           | 50         | No           | 2623                   | S1               |
| <b>Au/ZrO<sub>2</sub> NCs</b>                                 | NEt <sub>3</sub> | 50         | No           | 1593 <sup>a</sup>      | S2               |
| <b>Ag@Pd/C</b>                                                | Aqueous          | 20         | No           | 192                    | S3               |
| <b>Pd-S-SiO<sub>2</sub></b>                                   | Aqueous          | 85         | No           | 719                    | S4               |
| <b>AuPd@ED-MIL-101</b>                                        | HCOONa           | 90         | Yes          | 106                    | S5               |
| <b>PdAu/C-CeO<sub>2</sub></b>                                 | HCOONa           | 92         | 145 ppm      | 113.5                  | S6               |
| <b>Ag<sub>42</sub>Pd<sub>58</sub></b>                         | Aqueous          | 50         | No           | 328 <sup>a</sup>       | S7               |
| <b>Pd-B/C</b>                                                 | HCOONa           | 30         | No           | 1184                   | S8               |
| <b>PdAu@Au/C</b>                                              | HCOONa           | 92         | 30 ppm       | 21.4                   | S9               |
| <b>Co<sub>0.30</sub>Au<sub>0.35</sub>Pd<sub>0.35</sub></b>    | Aqueous          | 25         | No           | 80 <sup>a</sup>        | S10              |
| <b>Pd/APC</b>                                                 | HCOONa           | 55         | No           | 2999                   | S11              |
| <b>Pd/N-MS-30-two-175</b>                                     | HCOONa           | 60         | No           | 8414                   | S12              |
| <b>Pd<sub>0.6</sub>Ag<sub>0.4</sub>@ZrO<sub>2</sub>/C/rGO</b> | HCOONa           | 60         | No           | 4500                   | S13              |

<sup>a</sup> Initial TOF values calculated at the initial stages of the catalytic reactions.

**Table S2.** ICP results of Pd content for Pd/MS-30 and Arg-Pd/MS-30

| Sample                       | Pd content (wt%) |
|------------------------------|------------------|
| <b>Pd/MS-30</b>              | 7.92             |
| <b>Arg-Pd/MS-30</b>          | 3.81             |
| <b>Recycled Arg-Pd/MS-30</b> | 3.75             |

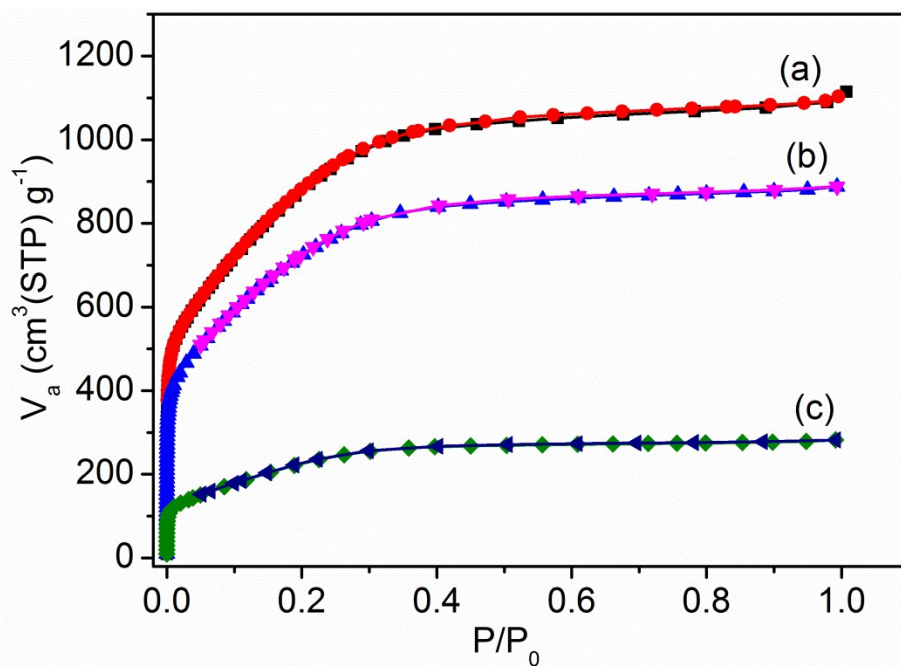

**Figure S1.**  $\text{N}_2$  sorption isotherms of (a) MSC-30, (b) Pd/MSC-30, and (c) Arg-Pd/MSC-30 at 77K.

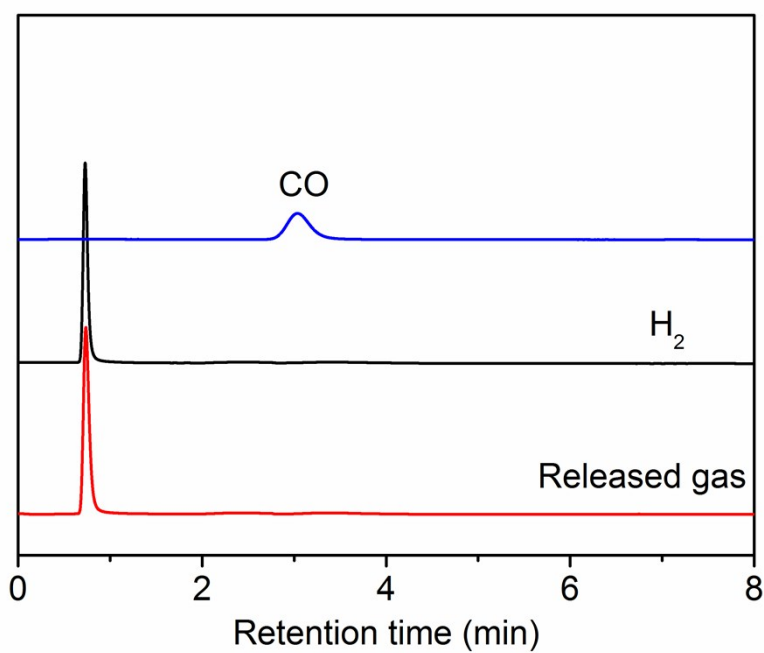

**Figure S2.** Gas chromatograms of CO and  $\text{H}_2$  as reference gases and the released gas from the dehydrogenation of FA over Arg-Pd/MSC-30 ( $n_{\text{Pd}}/n_{\text{FA}} = 0.01$ , FA/SF = 1:1, 323 K).

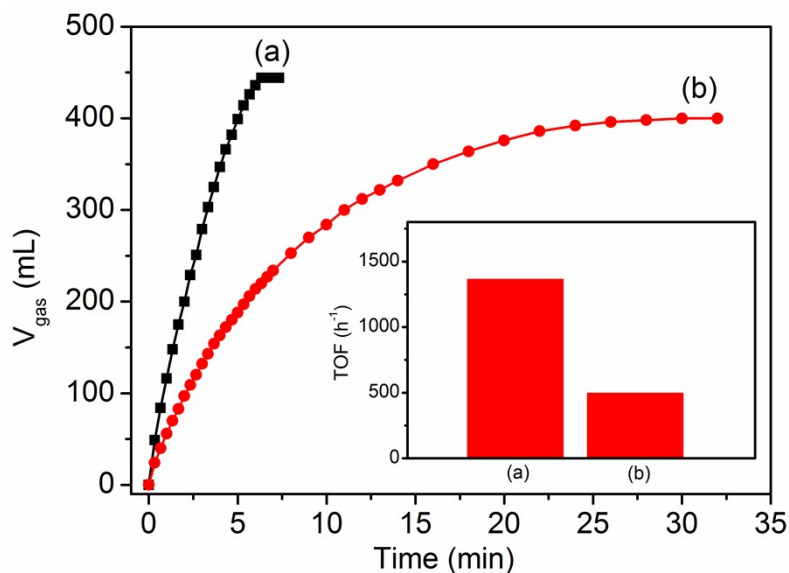

**Figure S3.** Volume of the generated gas ( $\text{CO}_2 + \text{H}_2$ ) versus time for the dehydrogenation of pure FA over the as-prepared (a) Arg-Pd/MSC-30 and (b) Pd/MSC-30 ( $n_{\text{Pd}}/n_{\text{FA}} = 0.01$ , 323 K,  $n_{\text{FA}} = 9.0$  mmol). Insert: corresponding TOF values for dehydrogenation of pure FA over the Arg-Pd/MSC-30 and Pd/MSC-30 catalysts.

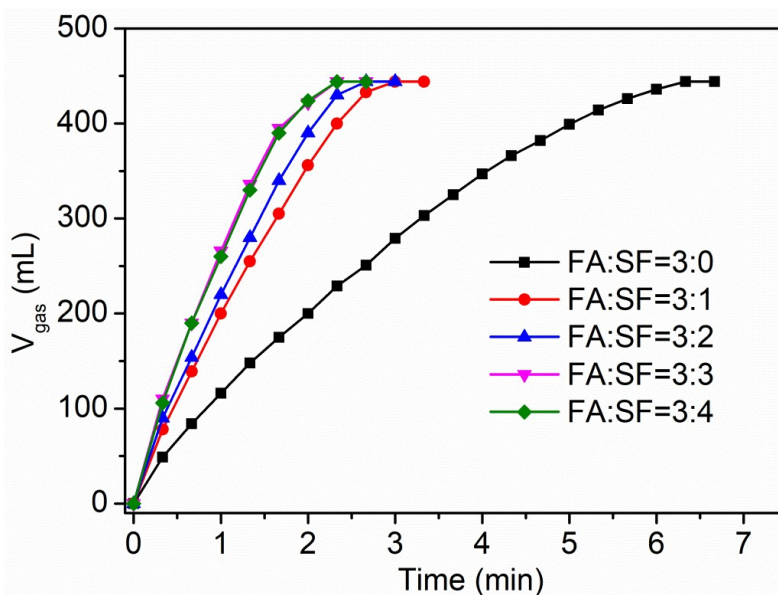

**Figure S4.** Volume of the generated gas ( $\text{CO}_2 + \text{H}_2$ ) versus time for the dehydrogenation of FA with different FA/SF molar ratios over the as-prepared Arg-Pd/MSC-30 catalyst ( $n_{\text{Pd}}/n_{\text{FA}} = 0.01$ , 323 K).

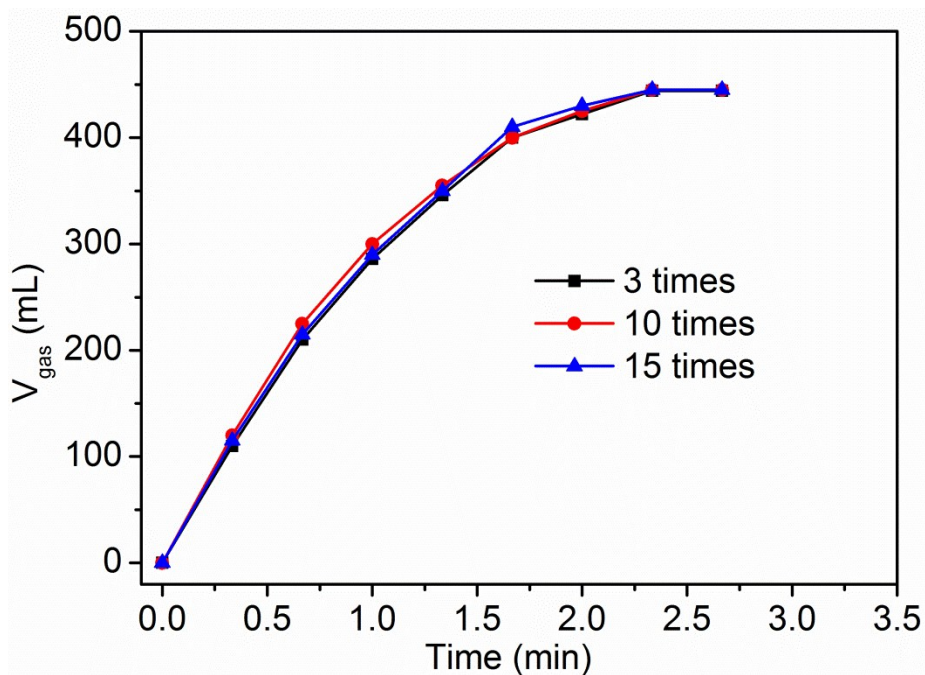

**Figure S5.** Volume of the generated gas ( $\text{CO}_2 + \text{H}_2$ ) versus time for the dehydrogenation of FA with over the as-prepared Arg-Pd/MSC-30 catalyst washed with different times after reduction ( $n_{\text{Pd}}/n_{\text{FA}} = 0.01$ , 323 K).

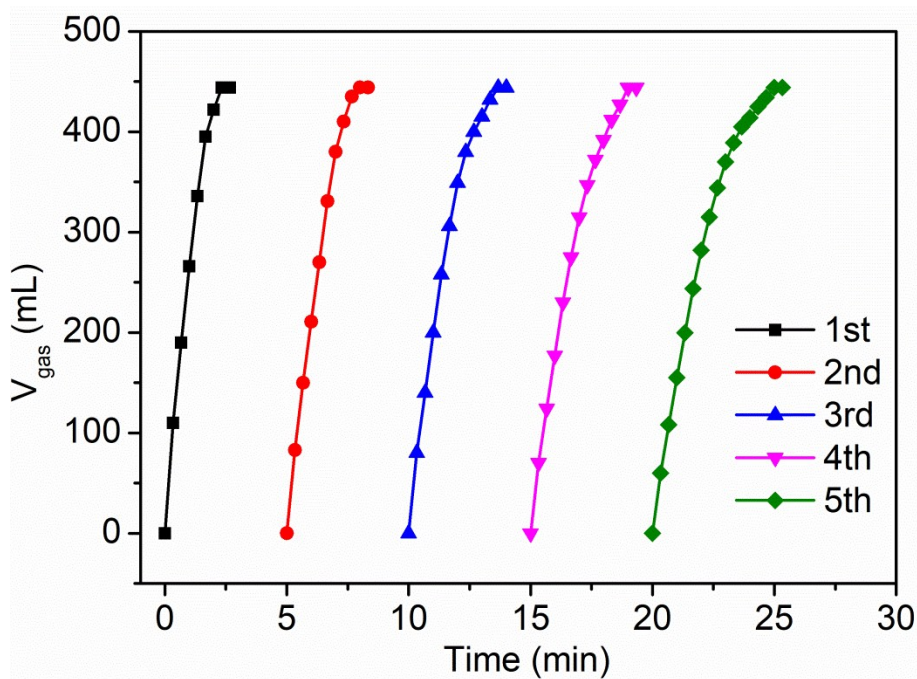

**Figure S6.** Durability test for the dehydrogenation of FA over Arg-Pd/MSC-30 ( $n_{\text{Pd}}/n_{\text{FA}} = 0.01$ , FA/SF = 1:1, 323 K).

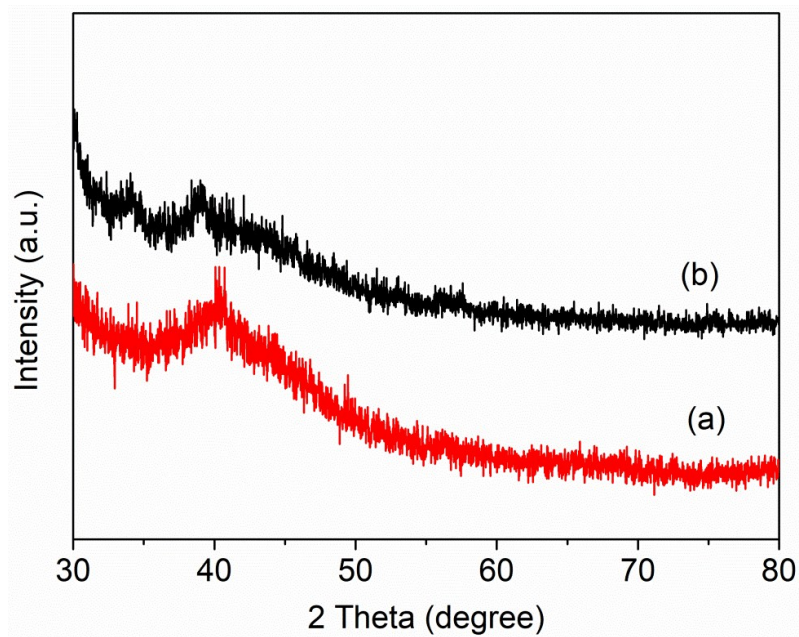

**Figure S7.** PXRD patterns of Arg-Pd/MSC-30 (a) before and (b) after catalysis.

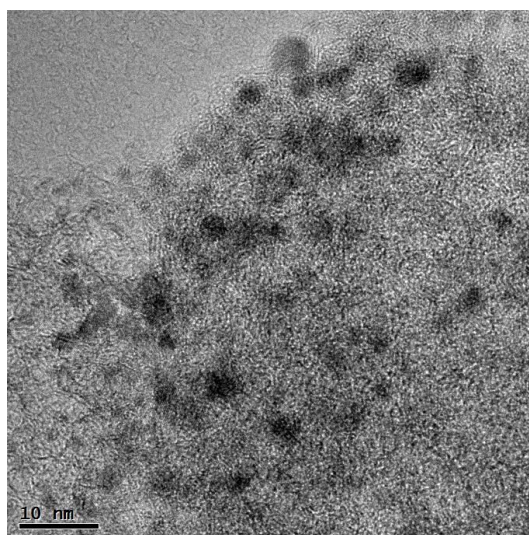

**Figure S8.** TEM image of Arg-Pd/MSC-30 after catalysis

## References

- (S1) Zhu, Q.-L.; Tsumori, N.; Xu, Q. *Chem. Sci.*, **2014**, 5, 195-199.
- (S2) Bi, Q.-Y.; Du, X.-L.; Liu, Y.-M.; Cao, Y.; He, H.-Y.; Fan, K.-N. *J. Am. Chem. Soc.*, **2012**, 134, 8926-8933.
- (S3) K. Tedsree, T. Li, S. Jones, C. W. A. Chan, K. M. K. Yu, P. A. Bagot, E. A. Marquis, G. D. Smith and S. C. E. Tsang, *Nat. Nanotech.*, **2011**, 6, 302-307.
- (S4) Zhao, Y.; Deng, L.; Tang, S.-Y.; Lai, D.-M.; Liao, B.; Fu, Y.; Guo, Q.-X., *Energy & Fuels*, **2011**, 25, 3693-3697.
- (S5) Gu, X.; Lu, Z.-H.; Jiang, H.-L.; T. Akita; Xu, Q. *J. Am. Chem. Soc.*, **2011**, 133, 11822-11825.
- (S6) Zhou, X.; Huang, Y.; Xing, W.; Liu, C.; Liao, J.; Lu, T. *Chem. Commun.*, **2008**, 30, 3540-3542.
- (S7) Zhang, S.; Metin, Ö.; Su, D.; Sun, S. *Angew. Chem. Int. Ed.*, **2013**, 52, 3681-3684.
- (S8) Jiang, K.; Xu, K.; Zou, S.; Cai, W.-B. *J. Am. Chem. Soc.*, **2014**, 136, 4861-4864.
- (S9) Huang, Y.; Zhou, X.; Yin, M.; Liu, C.; Xing, W. *Chem. Mater.*, **2010**, 22, 5122-5128.
- (S10) Wang, Z.-L.; Yan, J.-M.; Ping, Y.; Wang, H.-L.; Zheng, W.-T.; Jiang, Q. *Angew. Chem. Int. Ed.*, **2013**, 52, 4406-4409.
- (S11) Zhu, D.-J.; Wen, Y.-H.; Xu, Q.; Zhu, Q.-L.; Wu, X.-T., *Eur. J. Inorg. Chem.*, **2017**, 40, 4808-4813.
- (S12) Li, Z.; Yang, X.; Tsumori, N.; Liu, Z.; Himeda, Y.; Autrey, T.; Xu, Q., *ACS Catal.*, **2017**, 7, 2720-2724.
- (S13) Song, F.-Z.; Zhu, Q.-L.; Yang, X.; Zhan, W.-W.; Pachfule, P.; Tsumori, N.; Xu, Q., *Adv. Energy Mater.*, **2018**, 8, 1701416.
